# Supplementary material for: Phylogenetic diversity, trichothecene potential, and pathogenicity within Fusarium sambucinum species complex
Source: PLoS One. 2021 Jan 12;16(1):e0245037. doi: 10.1371/journal.pone.0245037 (PMC7802971; doi:10.1371/journal.pone.0245037)
Supplement: S3 Table — (XLSX) [file pone.0245037.s006.xlsx]

## Sheet:  S3 Table
S3 Table. Pathogenicity of Fusarium sambucinum species complex strains on cv. Apogee and toxin production in planta.
Cladea	Species IDb	Strain no.c	Toxin in vitro	Pathogenicd	%e	Aggressivef	%g	Toxin in plantah
Brachygibbosum	F. brachygibbosum	FRC R-7584	NEO	No	0	No	0	―
Brachygibbosum	F. sp. nov.-23	FRC R-8876	NEO	No	0	No	0	―
Brachygibbosum	F. sp. nov.-23	FRC R-7868	DAS, NEO	Yes	100	No	0	―
Brachygibbosum	F. sp. nov.-24	NRRL 66936	CAL, DAS, NEO	Yes	60	No	0	―
Brachygibbosum	F. sp. nov.-25	NRRL 66931	NEO	No	0	No	0	―
Brachygibbosum	F. sp. nov.-25	NRRL 66928	DAS, NEO	Yes	60	No	0	―
Brachygibbosum	F. sp. nov.-26	NRRL 66923	DAS, NEO	Yes	60	No	0	―
Brachygibbosum	F. sp. nov.-27	NRRL 66930	NEO	No	0	No	0	―
Brachygibbosum	F. sp. nov.-28	NRRL 66939	DAS, NEO	Yes	100	No	0	―
Brachygibbosum	F. sp. nov.-29	NRRL 66922	DAS, NIV	Yes	60	No	0	―
Brachygibbosum	F. sp. nov.-29	FRC R-9012	NIV	Yes	60	No	0	―
Brachygibbosum	F. sp. nov.-29	NRRL 66920	NIV	Yes	100	No	0	NIV
Brachygibbosum	F. sp. nov.-31	NRRL 66919	DAS, NIV	Yes	60	No	0	NIV
Brachygibbosum	F. sp. nov.-32	NRRL 66938	DAS	Yes	100	No	0	―
Brachygibbosum	F. sp. nov.-33	NRRL 66933	DAS, NIV	Yes	60	No	0	―
Brachygibbosum	F. transvaalense	FRC R-7052	―	No	0	No	0	―
Brachygibbosum	F. transvaalense	FRC R-6827	DAS, NIV	Yes	60	No	0	―
Graminearum	F. sp. nov.-5	NRRL 34461	CUL, 3ADON	Yes	100	Yes	100	DON, OHCUL
Graminearum	F. asiaticum	NRRL 13818	―	Yes	100	Yes	100	NIV, OHCUL
Graminearum	F. austroamericanum	NRRL 28585	NIV	Yes	100	Yes	100	CUL, NIV, OHCUL
Graminearum	F. boothii	NRRL 26916	CUL, 3ADON	Yes	100	Yes	100	DON
Graminearum	F. cerealis	NRRL 13721	NIV	Yes	100	Yes	100	NIV, OHCUL
Graminearum	F. cortaderiae	NRRL 29297	CUL, NIV	Yes	80	Yes	80	NIV
Graminearum	F. culmorum	NRRL 25475	―	Yes	80	Yes	80	CUL, DON, OHCUL
Graminearum	F. graminearum	NRRL 31084	CUL, 15ADON	Yes	100	Yes	100	DON
Graminearum	F. meridionale	NRRL 28436	NIV	Yes	100	Yes	100	NIV
Graminearum	F. praegraminearum	NRRL 39664	CUL, NIV	Yes	80	Yes	80	CUL, NIV, OHCUL
Graminearum	F. pseudograminearum	NRRL 28062	CUL, 3ADON	Yes	100	Yes	100	CUL, DON, OHCUL, 3ADON
Graminearum	F. vorosii	NRRL 37605	CUL, 15ADON	Yes	100	Yes	100	DON
Longipes	F. longipes-1	FRC R-3460	―	No	0	No	0	―
Longipes	F. longipes-2	FRC R-5127	―	No	0	No	0	―
Longipes	F. longipes-3	NRRL 20723	―	No	0	No	0	―
Longipes	F. longipes-4	FRC R-7358	―	No	0	No	0	―
Longipes	F. longipes-4	NRRL 20695	DAS	Yes	40	No	0	―
Longipes	F. sp. nov.-18	NRRL 66924	―	Yes	40	No	0	―
Longipes	F. sp. nov.-19	NRRL 66932	―	Yes	60	No	0	―
Longipes	F. sp. nov.-20	NRRL 66926	DAS	Yes	100	No	0	―
Longipes	F. sp. nov.-21	NRRL 66935	DAS	Yes	100	No	0	―
Longipes	F. sp. nov.-22	NRRL 66934	―	Yes	80	No	0	―
Novel	F. sp. nov.-6	NRRL 54683	DAS, NEO, T-2	No	0	No	0	―
Novel	F. sp. nov.-6	NRRL 28066	T-2	No	0	No	0	―
Novel	F. sp. nov.-6	NRRL 54640	NEO	Yes	80	No	0	―
Novel	F. sp. nov.-7	NRRL 46743	NEO, T-2	Yes	60	No	0	―
Sambucinum	F. kyushuense	NRRL 3509	DAS, NIV	Yes	100	No	0	NIV
Sambucinum	F. musarum	NRRL 28507	T-2	Yes	60	No	0	―
Sambucinum	F. poae	NRRL 39685	BUT, CUL, DAS	Yes	80	No	0	―
Sambucinum	F. poae	NRRL 36285	DAS	Yes	80	No	0	―
Sambucinum	F. robustum	NRRL 13392	NEO, T-2	Yes	100	No	0	―
Sambucinum	F. sambucinum	NRRL 66925	DAS, T-2	No	0	No	0	―
Sambucinum	F. sambucinum	FRC R-738	DAS	No	0	No	0	DAS
Sambucinum	F. sp. nov.-17	NRRL 26795	BUT, CAL, DAS, CAL	Yes	60	No	0	―
Sambucinum	F. sp. nov.-11	NRRL 22192	―	No	0	No	0	―
Sambucinum	F. sp. nov.-12	NRRL 66929	DAS	No	0	No	0	―
Sambucinum	F. sp. nov.-12	FRC R-7107	DAS	No	0	No	0	DAS
Sambucinum	F. sp. nov.-14	NRRL 36134	DAS, NEO, T-2	Yes	60	No	0	―
Sambucinum	F. sp. nov.-15	FRC R-8154	CUL, 3,7-diOH, 15-decal, 15-keto NX-2, 15-keto NX-3, 15-OHCUL	Yes	80	Yes	80	NX-3, OHCUL, 15-keto NX-3
Sambucinum	F. sp. nov.-15	FRC R-8203	CUL, 3,7-diOH, 15-decal, 15-keto NX-2, 15-keto NX-3, 15-OHCUL	Yes	100	Yes	100	NX-3, OHCUL, 15-keto NX-3
Sambucinum	F. sp. nov.-15	NRRL 66921	CUL, 3,7-diOH, 15-decal, 15-keto NX-2, 15-keto NX-3, 15-OHCUL	Yes	100	Yes	100	NX-3, OHCUL, 15-keto NX-3
Sambucinum	F. sp. nov.-16	FRC R-8136	CUL, 3,7-diOH, 15-decal, 15-keto NX-2, 15-keto NX-3, 15-OHCUL	Yes	80	Yes	80	NX-3, OHCUL, 15-keto NX-3
Sambucinum	F. sp. nov.-16	NRRL 66927	CUL, 3,7-diOH, 15-decal, 15-keto NX-2, 15-keto NX-3, 15-OHCUL	Yes	100	Yes	100	NX-3, OHCUL, 15-keto NX-3
Sambucinum	F. sp. nov.-8	NRRL 29296	DAS, NEO, T-2	Yes	100	No	0	T-2TE
Sambucinum	F. venenatum	NRRL 22198	BUT, DAS, 3OH	Yes	80	No	0	―
Sambucinum	F. venenatum	FRC R-8978	BUT, DAS	Yes	100	No	0	DAS, STC, 15-MAS
Sporotrichioides	F. armeniacum	FRC R-8609	DAS, NEO, T-2	Yes	80	No	0	―
Sporotrichioides	F. armeniacum	FRC R-7479	DAS, T-2	Yes	80	No	0	T-2TE
Sporotrichioides	F. goolgardii	KOD 1087	DAS, NEO, T-2	Yes	100	No	0	―
Sporotrichioides	F. langsethiae	NRRL 36236	CUL, DAS, NEO, T-2	No	0	No	0	―
Sporotrichioides	F. nodosum	NRRL 36351	DAS	Yes	100	No	0	―
Sporotrichioides	F. palustre	NRRL 54058	DAS, T-2	Yes	100	No	0	―
Sporotrichioides	F. sp. nov.-1	FRC R-8102	DAS, NEO, 3OH	Yes	60	No	0	―
Sporotrichioides	F. sp. nov.-2	NRRL 54062	DAS, NEO, T-2	Yes	100	No	0	T-2TE
Sporotrichioides	F. sp. nov.-4	NRRL 29896	DAS	Yes	60	No	0	―
Sporotrichioides	F. sporotrichioides	NRRL 13440	DAS, NEO, T-2	Yes	60	No	0	―
Sporotrichioides	F. sporotrichioides	NRRL 25474	DAS, NEO, T-2	Yes	100	No	0	―
Sporotrichioides	F. sporotrichioides	NRRL 36295	DAS, NEO, T-2	Yes	100	No	0	T-2TE
aBrachygibbosum, Fusarium brachygibbosum Clade; Graminearum, F. graminearum Clade; Longipes, F. longipes Clade; Novel, Novel Clade; Sambucinum, F. sambucinum Clade; Sporotrichioides, F. sporotrichioides Clade.
bF. sp. nov.-1 to -33, putatively novel species resolved within the FSAMSC; F. longipes-1 to-4, four phylogenetically distinct species within the F. longipes Clade previously reported in other studies.
cFRC, Fusarium Research Center, The Pennsylvania State University, University Park, Pennsylvania; NRRL, ARS Culture Collection, Peoria, Illinois. KOD, available from Kerry O’Donnell.
dYes, caused head blight symptoms; No, Fusarium head blight symptoms not visible.
ePercentage of heads (out of 5 heads) exhibiting Fusarium head blight symptoms.
fYes, isolate spread beyond inoculated floret; No, isolate did not spread beyond inoculated floret.
g% Percentage of heads showing Fusarium head blight symptoms in spikelets next to the inoculated one.
hCUL, culmorin; DAS, diacetoxyscirpenol; DON, deoxynivalenol; NIV; nivalenol; NX-3, NX-3 toxin; OHCUL, hydroxy culmorin; SCR, scirpentriol; T-2TE, T-2 tetraol 15-acetyl; 3ADON, 3-acetyldeoxynivalenol; 15-keto NX-3, novel type A trichothecene; 15-MAS, 15-monoacetoxyscirpenol; ―, toxin not detected.
